# Supplementary material for: Establishment and Characterization of a Spermatogonial Stem Cell Line from Tiger Puffer Fish (Takifugu rubripes)
Source: MDPI journal article supplement (doi:10.3390/ani13182959), 2023-09-19
Supplement: s1 [file s1]

|                                      |                                                                                                                                             |     |
|--------------------------------------|---------------------------------------------------------------------------------------------------------------------------------------------|-----|
| Takifugu_rubripes-_cox1_sequence.seq | TAT AATCGGAGCCCCAGACATGGCCTTCCCCGAATGAACAACATAAGCTTCTGACTGCTTCCCCCATCC                                                                      | 70  |
| TrSSCs-cox1_sequence_.seq            | TAT AATCGGAGCCCCAGACATGGCCTTCCCCGAATGAACAACATAAGCTTCTGACTGCTTCCCCCATCC                                                                      | 70  |
| Consensus                            | t a t a a t c g g a g e c c c a g a c a t g g c c t t c c c c g a a t g a a c a a c a t a a g e t t c t g a c t g e t t c c c c a t c c     |     |
| Takifugu_rubripes-_cox1_sequence.seq | TTCTCTCTTCTGCTCGCATCCTCTGGAGTAGAAGCGGAGCGGGTACGGCTGAACCTGTTTACCCACCCG                                                                       | 140 |
| TrSSCs-cox1_sequence_.seq            | TTCTCTCTTCTGCTCGCATCCTCTGGAGTAGAAGCGGAGCGGGTACGGCTGAACCTGTTTACCCACCCG                                                                       | 140 |
| Consensus                            | t t c c t c t t c t g e t c g a t c c t c t g g a g t a g a a g c e g g a g e g g g t a c g g g e t g a a c t g t t t a c c c a c c c c     |     |
| Takifugu_rubripes-_cox1_sequence.seq | TAGCAGGAAATCTTGCCACGCAGGGGCTTCTGTAGACCTCACCATCTTCTCTCTTCATCTTTGCAGGGGT                                                                      | 210 |
| TrSSCs-cox1_sequence_.seq            | TAGCAGGAAATCTTGCCACGCAGGGGCTTCTGTAGACCTCACCATCTTCTCTCTTCATCTTTGCAGGGGT                                                                      | 210 |
| Consensus                            | t a g c a g g a a a t c t t g c c c a c g c a g g g g e t t c t g t a g a c c t c a c c a t c t t c t c t t c a t c t t g c a g g g g t     |     |
| Takifugu_rubripes-_cox1_sequence.seq | CTCCTCTATTCTAGGGGCAATCAACTTCATCACAACCATCATTAACATGAAGCCCCAGCAATCTCACAA                                                                       | 280 |
| TrSSCs-cox1_sequence_.seq            | CTCCTCTATTCTAGGGGCAATCAACTTCATCACAACCATCATTAACATGAAGCCCCAGCAATCTCACAA                                                                       | 280 |
| Consensus                            | c t c c t c t a t t c t a g g g g c a a t c a a c t t c a t c a c a a c c a t c a t t a a c a t g a a g c c c c a g c a a t c t c a c a a   |     |
| Takifugu_rubripes-_cox1_sequence.seq | TACCAACACCTCTTTTCGTGTGAGCCGTTTTAATTACTGCTGTACTTCTCCTGCTTCCCTTCCAGTCC                                                                        | 350 |
| TrSSCs-cox1_sequence_.seq            | TACCAACACCTCTTTTCGTGTGAGCCGTTTTAATTACTGCTGTACTTCTCCTGCTTCCCTTCCAGTCC                                                                        | 350 |
| Consensus                            | t a c c a a a c a c c t c t t t t c g t g t g a g c c g t t t t a a t t a c t g e t g t a c t t c t c e t c t c c c t t c c a g t c c       |     |
| Takifugu_rubripes-_cox1_sequence.seq | TTGCAGCAGGGATTACAATACTTCTCACTGACCGAAACCTAAATACAACCTTCTTTGACCCAGCAGGAGG                                                                      | 420 |
| TrSSCs-cox1_sequence_.seq            | TTGCAGCAGGGATTACAATACTTCTCACTGACCGAAACCTAAATACAACCTTCTTTGACCCAGCAGGAGG                                                                      | 420 |
| Consensus                            | t t g c a g c a g g g a t t a c a a t a c t t c t c a c t g a c c g a a a c c t a a t a c a a c c t t c t t t g a c c c a g c a g g a g g   |     |
| Takifugu_rubripes-_cox1_sequence.seq | AGGAGACCCCATCTTGTACCAACACTTATTCTGATTCTTTGGACACCTGAAGTCTACATTCTAATTCTCT                                                                      | 490 |
| TrSSCs-cox1_sequence_.seq            | AGGAGACCCCATCTTGTACCAACACTTATTCTGATTCTTTGGACACCTGAAGTCTACATTCTAATTCTCT                                                                      | 490 |
| Consensus                            | a g g a g a c c c c a t c t t g t a c c a a c a c t t a t t c t g a t t c t t t g g a c a c c c t g a a g t c t a c a t t c t a a t t c t c |     |
| Takifugu_rubripes-_cox1_sequence.seq | CCTGGCTTCGGAATAATTTACACACATCGTAGCCTACTACTCGGGCAAAAAAGAACCTTCGGCTACATGG                                                                      | 560 |
| TrSSCs-cox1_sequence_.seq            | CCTGGCTTCGGAATAATTTACACACATCGTAGCCTACTACTCGGGCAAAAAAGAACCTTCGGCTACATGG                                                                      | 560 |
| Consensus                            | c c t g g c t t c g g a a t a a t t t c a c a c a t c g t a g c c t a c t a c t c g g g c a a a a a g a a c c a t t c g g c t a c a t g g   |     |
| Takifugu_rubripes-_cox1_sequence.seq | GCATGGTCTGAGCCATAATGGCCATCGGTCTTCTTGGTTTTATTGTATGAGCCCACCACATGTTACAGT                                                                       | 630 |
| TrSSCs-cox1_sequence_.seq            | GCATGGTCTGAGCCATAATGGCCATCGGTCTTCTTGGTTTTATTGTATGAGCCCACCACATGTTACAGT                                                                       | 630 |
| Consensus                            | g c a t g g t c t g a g c c a t a a t g g c c a t c g g t c t t c t t g g t t t t a t t g t a t g a g c c c a c c a c a t g t t a c a g t   |     |
| Takifugu_rubripes-_cox1_sequence.seq | CGGCATGGACGTAGACACCCGAGCCTACTTTACCTCTGCCACAATAATTATTGCCATCCCAGACAGGAGTC                                                                     | 700 |
| TrSSCs-cox1_sequence_.seq            | CGGCATGGACGTAGACACCCGAGCCTACTTTACCTCTGCCACAATAATTATTGCCATCCCAGACAGGAGTC                                                                     | 700 |
| Consensus                            | c g g c a t g g a c g t a g a c a c c c g a g c c t a c t t t a c c t c t g c c a c a a t a a t t a t t g c c a t c c c a c a g g a g t c   |     |
| Takifugu_rubripes-_cox1_sequence.seq | AAAGTATTTAGCTGACTTGCAACCTTGCATGGAGGATCAATTAAATGAGAAACCCCTATACTATGAGCCC                                                                      | 770 |
| TrSSCs-cox1_sequence_.seq            | AAAGTATTTAGCTGACTTGCAACCTTGCATGGAGGATCAATTAAATGAGAAACCCCTATACTATGAGCCC                                                                      | 770 |
| Consensus                            | a a a g t a t t t a g c t g a c t t g c a a c c t t g c a t g g a g g a t c a a t t a a t g a g a a c c c c t a t a c t a t g a g c c c     |     |
| Takifugu_rubripes-_cox1_sequence.seq | TCGGCTTCATCTTCTATTTACAGTGGGTGGCCTAACCGGAATTGTCCTAGCCAATTATCCCTAGACAT                                                                        | 840 |
| TrSSCs-cox1_sequence_.seq            | TCGGCTTCATCTTCTATTTACAGTGGGTGGCCTAACCGGAATTGTCCTAGCCAATTATCCCTAGACAT                                                                        | 840 |
| Consensus                            | t c g g c t t c a t c t t c e a t t t a c a g t g g g t g g c c t a a c c g g a a t t g t c c t a g c c a a t t c a t c c c t a g a c a t   |     |
| Takifugu_rubripes-_cox1_sequence.seq | CGTATTACACGACACCTACTACGTAGTTGCCATTTCCTACTAC                                                                                                 | 883 |
| TrSSCs-cox1_sequence_.seq            | CGTATTACACGACACCTACTACGTAGTTGCCATTTCCTACTAC                                                                                                 | 883 |
| Consensus                            | c g t a t t a c a c g a c a c c t a c t a c g t a g t t g c c a t t t c c a c t a c                                                         |     |

**Supplementary Figure S1. Sequence of *cox1* gene of *T. rubripes* and TrSSCs.** The *cox1* PCR product was 883 bp in length. The sequence alignment analysis showed 100% similarity between the sequences from TrSSC and that from tiger puffer fish (Genbank accession number: AJ421455).
